# Supplementary material for: Stenting or angioplasty for the treatment of deep vein thrombosis: Systematic review and meta-analysis of randomized controlled trials
Source: PubMed Central journal article supplement — Medicine (Baltimore). 2023 Jun 2;102(22):e33924. doi: 10.1097/MD.0000000000033924 (PMC10237682; doi:10.1097/md.0000000000033924), 2023-06-02
Supplement: medi-102-e33924-s002.pdf [file medi-102-e33924-s002.pdf]

# Supplementary file

## 2. Search strategies

| Database                | Search strategy                                                                                                                                                                                                                                                                                                                                                                                                                                                                                                                                                                                                                                                                                                                                                                                                                                                                                                                                                                                                                                                                                                                                                                                                                                                                                                                                                                                                                                                                                                                                                                                                                                      | Results (5 Nov 2021) | Results (from 5 Nov 2021 to 2 May 2023) |
|-------------------------|------------------------------------------------------------------------------------------------------------------------------------------------------------------------------------------------------------------------------------------------------------------------------------------------------------------------------------------------------------------------------------------------------------------------------------------------------------------------------------------------------------------------------------------------------------------------------------------------------------------------------------------------------------------------------------------------------------------------------------------------------------------------------------------------------------------------------------------------------------------------------------------------------------------------------------------------------------------------------------------------------------------------------------------------------------------------------------------------------------------------------------------------------------------------------------------------------------------------------------------------------------------------------------------------------------------------------------------------------------------------------------------------------------------------------------------------------------------------------------------------------------------------------------------------------------------------------------------------------------------------------------------------------|----------------------|-----------------------------------------|
| Lilacs/IBE CS (via VHL) | ((MH:(Stents) OR (Sondas) OR MH:(Drug-Eluting Stents) OR (Stents Liberadores de Fármacos) OR (Stents Farmacológicos) OR (Stents Revestidos com Drogas) OR (Stents Revestidos com Medicamentos) OR MH:(Angioplasty) OR (Angioplastia) OR (Angioplastia Transluminal) OR (Reconstrução Endoluminal) OR (Angioplastia Transluminal Percutânea) OR (Angioplastia Percutânea Transluminal) OR (E02.148.050*) OR (E04.100.814.529.124*) OR (E04.502.382.124*) OR MH:(Angioplasty Balloon) OR (Angioplastia de Balón) OR (Angioplastia com Balão) OR (E02.148.050.060*) OR (E04.100.814.529.124.060*) OR (E04.502.382.124.060*) OR MH:(Angioplasty Laser) OR (Angioplastia por Láser) OR (Angioplastia a Laser) OR (E02.148.050.075*) OR (E02.594.060*) OR (E04.014.520.060*) OR (E04.100.814.529.124.075*) OR (E04.502.382.124.075*) OR MH:(Angioplasty Balloon Laser-Assisted) OR (Angioplastia de Balón Asistida por Láser) OR (Angioplastia com Balão a Laser) OR (Angioplastia Transluminal Percutânea a Laser) OR (E02.148.050.060.105*) OR (E02.148.050.075.080*) OR (E02.594.060.080*) OR (E04.014.520.060.080*) OR (E04.100.814.529.124.060.105*) OR (E04.100.814.529.124.075.080*) OR (E04.502.382.124.060.105*) OR (E04.502.382.124.075.080*)) AND (MH:(Thrombosis) OR (Trombosis) OR (Trombose) OR (Trombo) OR MH:(Embolism and Thrombosis) OR (Embolia y Trombosis) OR (Embolia e Trombose) OR (Trombose e Embolia) OR MH:(Venous Thrombosis) OR (Trombosis de la Vena) OR (Trombose Venosa) OR (Flebotrombose) OR (Trombose de Veias Profundas) OR (Trombose de Veia Profunda) OR (Trombose Venosa Profunda))) AND (DB:("IBECS" OR "LILACS")) | 539                  | 16                                      |
| MEDLINE (via PubMed)    | ("Stents"[Mesh] or Stent* or (Drug-Eluting Stent*) or "Angioplasty"[Mesh] or Angioplast* or (Endoluminal Repair*) or (Percutaneous Transluminal Angioplasty) or (Transluminal                                                                                                                                                                                                                                                                                                                                                                                                                                                                                                                                                                                                                                                                                                                                                                                                                                                                                                                                                                                                                                                                                                                                                                                                                                                                                                                                                                                                                                                                        | 21374                | 3875                                    |

|                                      |                                                                                                                                                                                                                                                                                                                                                                                                                                                                                                                                                                                                                                                                                                                                                                                                                                                                                                                                                                                                                                                                                                                                                                                                                                                                                                                                                                                                                                                                                                                                                                                                                                                                                                                                                                                                                                                                          |             |             |
|--------------------------------------|--------------------------------------------------------------------------------------------------------------------------------------------------------------------------------------------------------------------------------------------------------------------------------------------------------------------------------------------------------------------------------------------------------------------------------------------------------------------------------------------------------------------------------------------------------------------------------------------------------------------------------------------------------------------------------------------------------------------------------------------------------------------------------------------------------------------------------------------------------------------------------------------------------------------------------------------------------------------------------------------------------------------------------------------------------------------------------------------------------------------------------------------------------------------------------------------------------------------------------------------------------------------------------------------------------------------------------------------------------------------------------------------------------------------------------------------------------------------------------------------------------------------------------------------------------------------------------------------------------------------------------------------------------------------------------------------------------------------------------------------------------------------------------------------------------------------------------------------------------------------------|-------------|-------------|
|                                      | <p>Angioplast*) or "Endovascular Procedures"[Mesh] or (Endovascular Procedure*) or (Intravascular Procedure*) or (Intravascular Technique*) or (Endovascular Technique*) or "Blood Vessel Prosthesis"[Mesh] or (Prosthes* Blood Vessel) or (Vascular Prosthes*) or (Tissue-Engineered Vascular Graft*) or (Tissue Engineered Vascular Graft*) or "Blood Vessel Prosthesis Implantation"[Mesh] or (Implantation Blood Vessel Prosthes*) or (Vascular Prosthes* Implantation) or (venovo stent) or wallstent or (vici venous stent)) and ("Venous Thrombosis"[Mesh] or Phlebothrombos* or (Thrombos* Venous) or (Deep Vein Thrombos*) or (Deep-Venous Thrombos*) or (Deep-Vein Thrombos*) or (Deep Venous Thrombos*) or "Venous Thromboembolism"[Mesh] or (Thromboembolism Venous) or "Thrombosis"[Mesh] or Thrombos* or Thrombus or Blood Clot* or "Thromboembolism"[Mesh] or Thromboembolism* or "Pulmonary Embolism"[Mesh] or (Pulmonary Embolism*) or (Pulmonary Thromboembolism*)) and (Therapy/Broad[filter])</p>                                                                                                                                                                                                                                                                                                                                                                                                                                                                                                                                                                                                                                                                                                                                                                                                                                                    |             |             |
| <p>Embase<br/>(via<br/>Elsevier)</p> | <p>('stent'/exp OR stent* OR ('drug eluting' AND stent*) OR 'angioplasty'/exp OR angioplast* OR (endoluminal AND repair*) OR (percutaneous AND transluminal AND angioplasty) OR (transluminal AND angioplast*) OR 'endovascular surgery'/exp OR (endovascular AND procedure*) OR (intravascular AND procedure*) OR (intravascular AND technique*) OR (endovascular AND technique*) OR 'blood vessel prosthesis'/exp OR (prosthes* AND blood AND vessel) OR (vascular AND prosthes*) OR ('tissue engineered' AND vascular AND graft*) OR (tissue AND engineered AND vascular AND graft*) OR (implantation AND blood AND vessel AND prosthes*) OR (vascular AND prosthes* AND implantation) OR (venovo AND stent) OR wallstent OR (vici AND venous AND stent)) AND (('vein thrombosis'/exp OR phlebothrombos* OR (thrombos* AND venous) OR (deep AND vein AND thrombos*) OR ('deep venous' AND thrombos*) OR ('deep vein' AND thrombos*) OR (deep AND venous AND thrombos*) OR 'venous thromboembolism'/exp OR (thromboembolism AND venous) OR 'thrombosis'/exp OR thrombos* OR thrombus OR blood) AND clot* OR 'thromboembolism'/exp OR thromboembolism* OR 'lung embolism'/exp OR (pulmonary AND embolism*) OR (pulmonary AND thromboembolism*)) AND ('crossover procedure'/exp OR 'cross over clinical study' OR 'cross over clinical trial' OR 'cross over comparison' OR 'cross over design' OR 'cross over method' OR 'cross over procedure' OR 'cross over study' OR 'cross over test' OR 'cross over trial' OR 'cross-over studies' OR 'crossover clinical study' OR 'crossover clinical trial' OR 'crossover comparison' OR 'crossover design' OR 'crossover method' OR 'crossover procedure' OR 'crossover study' OR 'crossover test' OR 'crossover trial' OR 'double blind cross over study' OR 'double blind crossover study' OR 'procedure, crossover' OR</p> | <p>5536</p> | <p>2048</p> |

|                                         |                                                                                                                                                                                                                                                                                                                                                                                                                                                                                                                                                                                                                                                                                                                                                                                                                                                                                                                                                                                                                                                                                                                                                                                                                                                                                                                                                                                                                                                                         |      |      |
|-----------------------------------------|-------------------------------------------------------------------------------------------------------------------------------------------------------------------------------------------------------------------------------------------------------------------------------------------------------------------------------------------------------------------------------------------------------------------------------------------------------------------------------------------------------------------------------------------------------------------------------------------------------------------------------------------------------------------------------------------------------------------------------------------------------------------------------------------------------------------------------------------------------------------------------------------------------------------------------------------------------------------------------------------------------------------------------------------------------------------------------------------------------------------------------------------------------------------------------------------------------------------------------------------------------------------------------------------------------------------------------------------------------------------------------------------------------------------------------------------------------------------------|------|------|
|                                         | 'double blind procedure'/exp OR 'double blind clinical trial' OR 'double blind comparison' OR 'double blind design' OR 'double blind procedure' OR 'double blind studies' OR 'double blind study' OR 'double blind test' OR 'double blind trial' OR 'double masked clinical study' OR 'double masked clinical trial' OR 'double masked comparison' OR 'double masked design' OR 'double masked method' OR 'double masked procedure' OR 'double masked study' OR 'double masked test' OR 'double masked trial' OR 'double-blind clinical study' OR 'double-blind method' OR 'randomized controlled trial'/exp OR 'controlled trial, randomized' OR 'randomised controlled study' OR 'randomised controlled trial' OR 'randomized controlled study' OR 'randomized controlled trial' OR 'trial, randomized controlled' OR 'single blind procedure'/exp OR 'procedure, single blind' OR 'single blind clinical study' OR 'single blind clinical trial' OR 'single blind comparison' OR 'single blind design' OR 'single blind procedure' OR 'single blind studies' OR 'single blind study' OR 'single blind test' OR 'single blind trial' OR 'single masked clinical study' OR 'single masked clinical trial' OR 'single masked comparison' OR 'single masked design' OR 'single masked method' OR 'single masked procedure' OR 'single masked study' OR 'single masked test' OR 'single masked trial' OR 'single-blind method' OR 'study, single blind') AND [embase]/lim |      |      |
| CENTRAL<br>(via<br>Cochrane<br>Library) | <p>#1 MeSH descriptor: [Angioplasty] explode all trees</p> <p>#2 MeSH descriptor: [Endovascular Procedures] explode all trees</p> <p>#3 MeSH descriptor: [Blood Vessel Prosthesis] explode all trees</p> <p>#4 MeSH descriptor: [Blood Vessel Prosthesis Implantation] explode all trees</p> <p>#5 MeSH descriptor: [Stents] explode all trees</p> <p>#6 (venovo stent) or wallstent or (vici venous stent)</p> <p>#7 MeSH descriptor: [Venous Thrombosis] explode all trees</p> <p>#8 MeSH descriptor: [Venous Thromboembolism] explode all trees</p> <p>#9 MeSH descriptor: [Thrombosis] explode all trees</p> <p>#10 MeSH descriptor: [Thromboembolism] explode all trees</p>                                                                                                                                                                                                                                                                                                                                                                                                                                                                                                                                                                                                                                                                                                                                                                                        | 2307 | 1882 |

|                                         |     |                                                                                                                  |              |             |
|-----------------------------------------|-----|------------------------------------------------------------------------------------------------------------------|--------------|-------------|
|                                         | #11 | MeSH descriptor: [Pulmonary Embolism] explode all trees                                                          |              |             |
|                                         | #12 | (thrombus* or thrombopro* or thrombotic* or thrombolic* or thromboemboli* or thrombos* or embol* or microembol*) |              |             |
|                                         | #13 | #1 or #2 or #3 or #4 or #5 or #6                                                                                 |              |             |
|                                         | #14 | #7 or #8 or #9 or #10 or #11 or #12                                                                              |              |             |
|                                         | #15 | #13 and #14                                                                                                      |              |             |
|                                         | #16 | #15 and trials                                                                                                   |              |             |
| CINAHL                                  | 1   | thrombosis and angioplasty                                                                                       | 2092         | 1402        |
|                                         | 2   | deep vein thrombosis and stent                                                                                   |              |             |
| British Library EThOS                   | 1   | thrombosis and angioplasty                                                                                       | 5            | 3           |
|                                         | 2   | deep vein thrombosis and stent                                                                                   |              |             |
| ProQuest Dissertations & thesis         | 1   | thrombosis and angioplasty                                                                                       | 180          | 23          |
|                                         | 2   | deep vein thrombosis and stent                                                                                   |              |             |
| OpenGrey .eu                            | 1   | thrombosis and angioplasty                                                                                       | 3            | 0           |
|                                         | 2   | deep vein thrombosis and stent                                                                                   |              |             |
| Clinical trials                         | 1   | thrombosis and angioplasty                                                                                       | 98           | 48          |
|                                         | 2   | deep vein thrombosis and stent                                                                                   |              |             |
| ICTRP                                   | 1   | thrombosis and angioplasty                                                                                       | 37           | 6           |
|                                         | 2   | deep vein thrombosis and stent                                                                                   |              |             |
| SubTotal                                |     |                                                                                                                  | 32172        | 9303        |
| <b>Records after duplicates removed</b> |     |                                                                                                                  | <b>25515</b> | <b>5002</b> |
